# Supplementary material for: Retrospective Case-Control Study of 2017 G2P[4] Rotavirus Epidemic in Rural and Remote Australia
Source: Pathogens. 2020 Sep 26;9(10):790. doi: 10.3390/pathogens9100790 (PMC7601783; doi:10.3390/pathogens9100790)
Supplement: Supplementary file 1 [file pathogens-09-00790-s001.pdf]

**Supplementary Materials:**

**Figure S1.** Selection of rotavirus cases and un-matched disease register controls for disease register nested case-control study.

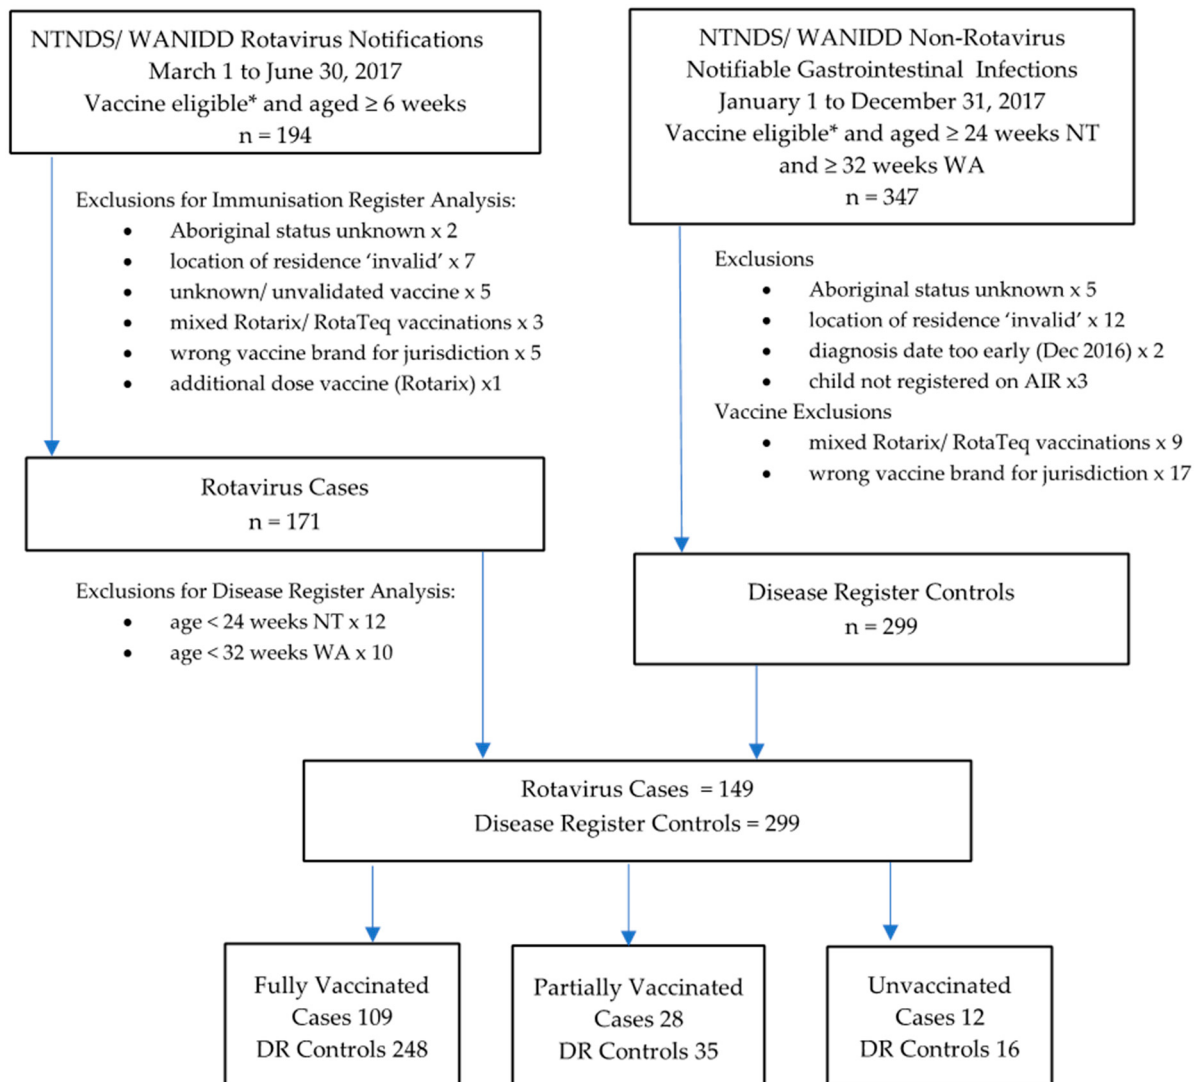

\*Vaccine Eligible: children eligible by date-of-birth to have received at least one dose of Rotarix vaccine (those born after July 1, 2006 in the Northern Territory) or at least one dose of RotaTeq vaccine (those born after 1 May 2009 in Western Australia).

**Table S1.** Baseline characteristics of rotavirus cases and disease register controls for the unmatched disease-register nested case-control study.

| Characteristic                   | Rotavirus Cases |           | Disease Register Controls |           |
|----------------------------------|-----------------|-----------|---------------------------|-----------|
|                                  | NT              | WA        | NT                        | WA        |
|                                  | n = 71          | n = 78    | n = 123                   | n = 176   |
| <b>Age</b>                       |                 |           |                           |           |
| Median Age (months)              | 20              | 20        | 23                        | 33        |
| Age Range (months)               | 5 to 72         | 7 to 94   | 5 to 132                  | 8 to 99   |
| 24 (NT)/ 32 (WA) wks to < 1 year | 13 (18%)        | 13 (17%)  | 20 (16%)                  | 17 (10%)  |
| 1 year to < 2 years              | 36 (51%)        | 34 (44%)  | 42 (34%)                  | 44 (25%)  |
| 2 year to < 3 years              | 11 (16%)        | 15 (19%)  | 19 (15%)                  | 38 (22%)  |
| 3 year to < 4 years              | 7 (10%)         | 5 (6%)    | 19 (15%)                  | 23 (13%)  |
| 4 years to < 5 years             | 3 (4%)          | 5 (6%)    | 5 (4%)                    | 18 (10%)  |
| ≥ 5 years                        | 1 (1%)          | 6 (8%)    | 18 (15%)                  | 36 (20%)  |
| <b>Sex</b>                       |                 |           |                           |           |
| Female                           | 35 (49%)        | 39 (50%)  | 58 (47%)                  | 85 (48%)  |
| Male                             | 36 (51%)        | 39 (50%)  | 65 (53%)                  | 91 (52%)  |
| <b>Aboriginal Status</b>         |                 |           |                           |           |
| Aboriginal                       | 59 (83%)        | 58 (74%)  | 110 (89%)                 | 73 (41%)  |
| Non-Aboriginal                   | 12 (17%)        | 20 (26%)  | 13 (11%)                  | 103 (59%) |
| <b>Geographical Area</b>         |                 |           |                           |           |
| Alice Springs                    | 10 (14%)        |           | 92 (75%)                  |           |
| Barkly                           | 61 (86%)        |           | 31 (25%)                  |           |
| Goldfields                       |                 | 14 (18%)  |                           | 48 (27%)  |
| Kimberley                        |                 | 47 (60%)  |                           | 61 (35%)  |
| Pilbara                          |                 | 17 (22%)  |                           | 67 (38%)  |
| <b>Organism</b>                  |                 |           |                           |           |
| Rotavirus                        | 71 (100%)       | 78 (100%) |                           |           |
| Rotavirus G2P[4]                 | 36 (51%)        | 54 (69%)  |                           |           |
| Campylobacter                    |                 |           | 22 (18%)                  | 33 (19%)  |
| Cryptosporidium                  |                 |           | 14 (11%)                  | 27 (15%)  |
| Salmonella                       |                 |           | 20 (16%)                  | 80 (46%)  |
| Shigella                         |                 |           | 67 (55%)                  | 36 (20%)  |
| <b>Hospitalisation</b>           |                 |           |                           |           |
| Yes                              | 56 (79%)        | 30 (39%)  | 67 (54%)                  | 38 (22%)  |
| No                               | 15 (21%)        | 37 (47%)  | 49 (40%)                  | 97 (55%)  |
| Unknown                          | 0 (0%)          | 11 (14%)  | 7 (6%)                    | 41 (23%)  |
| <b>Vaccination</b>               |                 |           |                           |           |
| 0 doses                          | 3 (4%)          | 9 (12%)   | 9 (7%)                    | 7 (4%)    |
| 1 doses                          | 10 (14%)        | 2 (2%)    | 6 (5%)                    | 7 (4%)    |
| 2 doses                          | 58 (82%)        | 16 (21%)  | 108 (88%)                 | 22 (12%)  |
| 3 doses                          |                 | 51 (65%)  |                           | 140 (80%) |

**Table S2.** Odds Ratio of vaccination in rotavirus cases versus controls in the matched population-based analysis and the disease register nested analysis (full results).

| Immunisation Status                           | Population-Based Analysis |          |                     | Disease Register Analysis |          |                     |
|-----------------------------------------------|---------------------------|----------|---------------------|---------------------------|----------|---------------------|
|                                               | Cases                     | Controls | Odds Ratio (95% CI) | Cases                     | Controls | Odds Ratio (95% CI) |
| <b>Any Dose vs None</b>                       | n = 171                   | n = 1626 | 0.79 (0.46, 1.34)   | n = 149                   | n = 299  | 0.58 (0.24, 1.39)   |
| ≥ One Dose Vaccine                            | 153                       | 1490     |                     | 137                       | 283      |                     |
| Unvaccinated                                  | 18                        | 136      |                     | 12                        | 16       |                     |
| <b>Any Dose vs None NT (Rotarix)</b>          | n = 83                    | n = 753  | 1.10 (0.50, 2.41)   | n = 71                    | n = 123  | 1.40 (0.34, 5.80)   |
| ≥ One Dose Vaccine                            | 75                        | 676      |                     | 68                        | 114      |                     |
| Unvaccinated                                  | 8                         | 77       |                     | 3                         | 9        |                     |
| <b>Any Dose vs None WA (RotaTeq)</b>          | n = 88                    | n = 873  | 0.56 (0.27, 1.16)   | n = 78                    | n = 176  | 0.30 (0.09, 0.98)   |
| ≥ One Dose Vaccine                            | 78                        | 814      |                     | 69                        | 169      |                     |
| Unvaccinated                                  | 10                        | 59       |                     | 9                         | 7        |                     |
| <b>Any Dose vs None &lt; 12 mths</b>          | n = 48                    | n = 449  | 0.48 (0.22, 1.02)   | n = 26                    | n = 37   | 0.28 (0.03, 2.83)   |
| ≥ One Dose Vaccine                            | 37                        | 392      |                     | 21                        | 36       |                     |
| Unvaccinated                                  | 11                        | 57       |                     | 5                         | 1        |                     |
| <b>Any Dose vs None ≥ 12mths</b>              | n = 134                   | n = 1177 | 1.22 (0.55, 2.73)   | n = 123                   | n = 262  | 0.81 (0.29, 2.28)   |
| ≥ One Dose Vaccine                            | 116                       | 1098     |                     | 116                       | 247      |                     |
| Unvaccinated                                  | 7                         | 79       |                     | 7                         | 15       |                     |
| <b>Full Dose vs None</b>                      | n = 129                   | n = 1008 | 0.83 (0.43, 1.58)   | n = 121                   | n = 264  | 0.55 (0.23, 1.32)   |
| Fully Vaccinated                              | 111                       | 913      |                     | 109                       | 248      |                     |
| Unvaccinated                                  | 18                        | 95       |                     | 12                        | 16       |                     |
| <b>Full Dose vs None NT (Rotarix)</b>         | n = 68                    | n = 529  | 2.06 (0.62, 6.83)   | n = 61                    | n = 117  | 1.27 (0.31, 5.23)   |
| Fully Vaccinated                              | 60                        | 469      |                     | 58                        | 108      |                     |
| Unvaccinated                                  | 8                         | 60       |                     | 3                         | 9        |                     |
| <b>Full Dose vs None WA (RotaTeq)</b>         | n = 61                    | n = 479  | 0.40 (0.18, 0.93)   | n = 60                    | n = 147  | 0.29 (0.09, 0.96)   |
| Fully Vaccinated                              | 51                        | 444      |                     | 51                        | 140      |                     |
| Unvaccinated                                  | 10                        | 35       |                     | 9                         | 7        |                     |
| <b>Full Dose vs None &lt; 12 mths</b>         | n = 29                    | n = 194  | 0.45 (0.15, 1.39)   | n = 21                    | n = 35   | 0.23 (0.02, 2.43)   |
| Fully Vaccinated                              | 18                        | 161      |                     | 16                        | 34       |                     |
| Unvaccinated                                  | 11                        | 33       |                     | 5                         | 1        |                     |
| <b>Full Dose vs None ≥ 12mths</b>             | n = 100                   | n = 814  | 1.08 (0.47, 2.44)   | n = 100                   | n = 229  | 0.79 (0.28, 2.22)   |
| Fully Vaccinated                              | 93                        | 752      |                     | 93                        | 214      |                     |
| Unvaccinated                                  | 7                         | 62       |                     | 7                         | 15       |                     |
| <b>Full Dose vs Partial Dose</b>              | n = 153                   | n = 1350 | 0.65 (0.42, 1.01)   | n = 137                   | n = 283  | 0.63 (0.35, 1.13)   |
| Fully Vaccinated                              | 111                       | 1060     |                     | 109                       | 248      |                     |
| Partially Vaccinated                          | 42                        | 290      |                     | 28                        | 35       |                     |
| <b>Full Dose vs Partial Dose NT (Rotarix)</b> | n = 75                    | n = 620  | 0.58 (0.29, 1.14)   | n = 68                    | n = 114  | 0.33 (0.11, 0.99)   |
| Fully Vaccinated                              | 60                        | 535      |                     | 58                        | 108      |                     |
| Partially Vaccinated                          | 15                        | 85       |                     | 10                        | 6        |                     |
| <b>Full Dose vs Partial Dose WA (RotaTeq)</b> | n = 78                    | n = 730  | 0.71 (0.40, 1.26)   | n = 69                    | n = 169  | 0.83 (0.40, 1.71)   |
| Fully Vaccinated                              | 51                        | 525      |                     | 51                        | 140      |                     |
| Partially Vaccinated                          | 27                        | 205      |                     | 18                        | 29       |                     |
| <b>Full Dose vs Partial Dose &lt; 12 mths</b> | n = 37                    | n = 314  | 0.49 (0.19, 1.28)   | n = 21                    | n = 36   | 0.23 (0.03, 1.62)   |
| Fully Vaccinated                              | 18                        | 183      |                     | 16                        | 34       |                     |
| Partially Vaccinated                          | 19                        | 131      |                     | 5                         | 2        |                     |
| <b>Full Dose vs Partial Dose ≥ 12mths</b>     | n = 116                   | n = 1036 | 0.70 (0.42, 1.16)   | n = 116                   | n = 247  | 0.78 (0.41, 1.50)   |
| Fully Vaccinated                              | 93                        | 877      |                     | 93                        | 214      |                     |
| Partially Vaccinated                          | 23                        | 159      |                     | 23                        | 33       |                     |

**Table 3.** Odds Ratio of vaccination in rotavirus cases versus controls in additional population-based analysis i) children age-eligible for full vaccination only (aged  $\geq 24$  weeks in the NT and  $\geq 32$  weeks in WA), ii) children aged  $< 5$  years only, iii) Aboriginal children only, and iv) ‘missing dose assumption’ removed.

| Immunisation Status                   | NT > 24wks & WA > 32 wks |          |                     | < 5 years |          |                     | Aboriginal Children Only |          |                     | No Missing Dose Assumption |          |                     |
|---------------------------------------|--------------------------|----------|---------------------|-----------|----------|---------------------|--------------------------|----------|---------------------|----------------------------|----------|---------------------|
|                                       | Cases                    | Controls | Odds Ratio (95% CI) | Cases     | Controls | Odds Ratio (95% CI) | Cases                    | Controls | Odds Ratio (95% CI) | Cases                      | Controls | Odds Ratio (95% CI) |
| <b>Any Dose vs None</b>               | n = 149                  | n = 1416 | 0.91 (0.49, 1.71)   | n = 164   | n = 1559 | 0.84 (0.48, 1.48)   | n = 137                  | n = 1290 | 0.73 (0.41, 1.29)   | n = 171                    | n = 1626 | 0.79 (0.46, 1.34)   |
| ≥ One Dose Vaccine                    | 137                      | 1313     |                     | 148       | 1431     |                     | 121                      | 1178     |                     | 153                        | 1490     |                     |
| Unvaccinated                          | 12                       | 103      |                     | 16        | 128      |                     | 16                       | 112      |                     | 18                         | 136      |                     |
| <b>Any Dose vs None NT (Rotarix)</b>  | n = 71                   | n = 641  | 2.31 (0.71, 7.58)   | n = 82    | n = 745  | 1.06 (0.48, 2.34)   | n = 71                   | n = 637  | 0.89 (0.40, 2.01)   | n = 83                     | n = 753  | 1.10 (0.50, 2.41)   |
| ≥ One Dose Vaccine                    | 68                       | 582      |                     | 74        | 670      |                     | 63                       | 573      |                     | 75                         | 676      |                     |
| Unvaccinated                          | 3                        | 59       |                     | 8         | 75       |                     | 8                        | 64       |                     | 8                          | 77       |                     |
| <b>Any Dose vs None WA (RotaTeg)</b>  | n = 78                   | n = 775  | 0.45 (0.21, 0.99)   | n = 82    | n = 814  | 0.64 (0.29, 1.43)   | n = 66                   | n = 653  | 0.58 (0.26, 1.30)   | n = 88                     | n = 873  | 0.56 (0.27, 1.16)   |
| ≥ One Dose Vaccine                    | 69                       | 731      |                     | 74        | 761      |                     | 58                       | 605      |                     | 78                         | 814      |                     |
| Unvaccinated                          | 9                        | 44       |                     | 8         | 53       |                     | 8                        | 48       |                     | 10                         | 59       |                     |
| <b>Any Dose vs None &lt; 12 mths</b>  | n = 26                   | n = 239  | 0.46 (0.16, 1.35)   | n = 48    | n = 449  | 0.48 (0.22, 1.02)   | n = 43                   | n = 399  | 0.41 (0.18, 0.90)   | n = 48                     | n = 449  | 0.48 (0.22, 1.02)   |
| ≥ One Dose Vaccine                    | 21                       | 215      |                     | 37        | 392      |                     | 32                       | 348      |                     | 37                         | 392      |                     |
| Unvaccinated                          | 5                        | 24       |                     | 11        | 57       |                     | 11                       | 51       |                     | 11                         | 57       |                     |
| <b>Any Dose vs None ≥ 12mths</b>      | n = 123                  | n = 1177 | 1.22 (0.55, 2.73)   | n = 116   | n = 1110 | 1.56 (0.62, 3.98)   | n = 94                   | n = 891  | 1.34 (0.52, 3.45)   | n = 123                    | n = 1177 | 1.22 (0.55, 2.73)   |
| ≥ One Dose Vaccine                    | 116                      | 1098     |                     | 111       | 1039     |                     | 89                       | 830      |                     | 116                        | 1098     |                     |
| Unvaccinated                          | 7                        | 79       |                     | 5         | 71       |                     | 5                        | 61       |                     | 7                          | 79       |                     |
| <b>Full Dose vs None</b>              | n = 121                  | n = 977  | 0.83 (0.44, 1.59)   | n = 122   | n = 951  | 0.91 (0.45, 1.83)   | n = 103                  | n = 778  | 0.77 (0.38, 1.58)   | n = 129                    | n = 993  | 0.84 (0.44, 1.60)   |
| Fully Vaccinated                      | 109                      | 894      |                     | 106       | 864      |                     | 87                       | 702      |                     | 111                        | 898      |                     |
| Unvaccinated                          | 12                       | 83       |                     | 16        | 87       |                     | 16                       | 76       |                     | 18                         | 95       |                     |
| <b>Full Dose vs None NT (Rotarix)</b> | n = 61                   | n = 500  | 2.09 (0.63, 6.94)   | n = 67    | n = 521  | 1.97 (0.59, 6.55)   | n = 59                   | n = 446  | 1.65 (0.49, 5.58)   | n = 68                     | n = 519  | 2.10 (0.63, 6.95)   |
| Fully Vaccinated                      | 58                       | 450      |                     | 59        | 463      |                     | 51                       | 396      |                     | 60                         | 459      |                     |

|                                                   |         |          |                      |         |          |                      |         |          |                   |         |          |                      |
|---------------------------------------------------|---------|----------|----------------------|---------|----------|----------------------|---------|----------|-------------------|---------|----------|----------------------|
| Unvaccinated                                      | 3       | 50       |                      | 8       | 58       |                      | 8       | 50       |                   | 8       | 60       |                      |
| <b>Full Dose vs None<br/>WA (RotaTeq)</b>         | n = 60  | n = 477  | 0.40 (0.18,<br>0.93) | n = 55  | n = 430  | 0.45 (0.18,<br>1.13) | n = 44  | n = 332  | 0.39 (0.15, 1.00) | n = 61  | n = 474  | 0.41 (0.18,<br>0.94) |
| Fully Vaccinated                                  | 51      | 444      |                      | 47      | 401      |                      | 36      | 306      |                   | 51      | 439      |                      |
| Unvaccinated                                      | 9       | 33       |                      | 8       | 29       |                      | 8       | 26       |                   | 10      | 35       |                      |
| <b>Full Dose vs None<br/>&lt; 12 mths</b>         | n = 21  | n = 163  | 0.47 (0.15,<br>1.44) | n = 29  | n = 194  | 0.45 (0.15,<br>1.39) | n = 26  | n = 169  | 0.34 (0.10, 1.12) | 29      | 190      | 0.47 (0.15,<br>1.44) |
| Fully Vaccinated                                  | 16      | 142      |                      | 18      | 161      |                      | 15      | 140      |                   | 18      | 157      |                      |
| Unvaccinated                                      | 5       | 21       |                      | 11      | 33       |                      | 11      | 29       |                   | 11      | 33       |                      |
| <b>Full Dose vs None<br/>≥ 12mths</b>             | n = 100 | n = 814  | 1.08 (0.47,<br>2.44) | n = 93  | n = 757  | 1.34 (0.52,<br>3.46) | n = 77  | n = 609  | 1.17 (0.45, 3.07) | n = 100 | n = 803  | 1.09 (0.48,<br>2.46) |
| Fully Vaccinated                                  | 93      | 752      |                      | 88      | 703      |                      | 72      | 562      |                   | 93      | 741      |                      |
| Unvaccinated                                      | 7       | 62       |                      | 5       | 54       |                      | 5       | 47       |                   | 7       | 62       |                      |
| <b>Full Dose vs Partial<br/>Dose</b>              | n = 137 | n = 1213 | 0.68 (0.43,<br>1.07) | n = 148 | n = 1308 | 0.62 (0.40,<br>0.96) | n = 121 | n = 1055 | 0.72 (0.44, 1.17) | n = 153 | n = 1350 | 0.75 (0.48,<br>1.17) |
| Fully Vaccinated                                  | 109     | 1026     |                      | 106     | 1026     |                      | 87      | 810      |                   | 111     | 1036     |                      |
| Partially Vaccinated                              | 28      | 187      |                      | 42      | 282      |                      | 34      | 245      |                   | 42      | 314      |                      |
| <b>Full Dose vs Partial<br/>Dose NT (Rotarix)</b> | n = 68  | n = 558  | 0.62 (0.30,<br>1.28) | n = 74  | n = 614  | 0.58 (0.29,<br>1.14) | n = 63  | n = 517  | 0.73 (0.34, 1.56) | n = 75  | n = 620  | 0.75 (0.38,<br>1.46) |
| Fully Vaccinated                                  | 58      | 504      |                      | 59      | 529      |                      | 51      | 438      |                   | 60      | 519      |                      |
| Partially Vaccinated                              | 10      | 54       |                      | 15      | 85       |                      | 12      | 79       |                   | 15      | 101      |                      |
| <b>Full Dose vs Partial<br/>Dose WA (RotaTeq)</b> | n = 69  | n = 655  | 0.72 (0.40,<br>1.29) | n = 74  | n = 694  | 0.65 (0.36,<br>1.16) | n = 58  | n = 538  | 0.70 (0.37, 1.35) | n = 78  | n = 730  | 0.76 (0.42,<br>1.36) |
| Fully Vaccinated                                  | 51      | 522      |                      | 47      | 497      |                      | 36      | 372      |                   | 51      | 517      |                      |
| Partially Vaccinated                              | 18      | 133      |                      | 27      | 197      |                      | 22      | 166      |                   | 27      | 213      |                      |
| <b>Full Dose vs Partial<br/>Dose &lt; 12 mths</b> | n = 21  | n = 177  | 0.57 (0.18,<br>1.78) | n = 37  | n = 314  | 0.49 (0.19,<br>1.28) | n = 32  | n = 270  | 0.40 (0.14, 1.11) | n = 37  | n = 314  | 0.56 (0.22,<br>1.44) |
| Fully Vaccinated                                  | 16      | 149      |                      | 18      | 183      |                      | 15      | 160      |                   | 18      | 178      |                      |
| Partially Vaccinated                              | 5       | 28       |                      | 19      | 131      |                      | 17      | 110      |                   | 19      | 136      |                      |
| <b>Full Dose vs Partial<br/>Dose ≥ 12mths</b>     | n = 116 | n = 1036 |                      | n = 111 | n = 994  | 0.66 (0.40,<br>1.09) | n = 89  | n = 785  | 0.85 (0.48, 1.51) | n = 116 | n = 1036 | 0.81 (0.49,<br>1.34) |
| Fully Vaccinated                                  | 93      | 877      |                      | 88      | 843      |                      | 72      | 650      |                   | 93      | 858      |                      |
| Partially Vaccinated                              | 23      | 159      |                      | 23      | 151      |                      | 17      | 135      |                   | 23      | 178      |                      |
